# Supplementary material for: TransDTI: Transformer-Based Language Models for Estimating DTIs and Building a Drug Recommendation Workflow
Source: PubMed Central journal article supplement — ACS Omega. 2022 Jan 12;7(3):2706–17. doi: 10.1021/acsomega.1c05203 (PMC8792915; doi:10.1021/acsomega.1c05203), 2022-01-12

# **TransDTI: Transformer-based language models for estimating DTIs and building a drug-recommendation workflow**

## **[Supplementary file 1]**

**Yogesh Kalakoti, Shashank Yadav and Durai Sundar\***

DAILAB, Department of Biochemical Engineering & Biotechnology, Indian Institute of Technology (IIT)  
Delhi, New Delhi - 110 016, India

\*Corresponding author

Email addresses:

YK: [yogesh.kalakoti@dbeb.iitd.ac.in](mailto:yogesh.kalakoti@dbeb.iitd.ac.in)

SY: [shashank.yadav1@alumni.iitd.ac.in](mailto:shashank.yadav1@alumni.iitd.ac.in)

DS: [sundar@dbeb.iitd.ac.in](mailto:sundar@dbeb.iitd.ac.in)

# 1. Supplementary tables

**Table S1: Paired t-test to compare docking scores of all the models under consideration for tgfb.**

|               | ESM Family    |              |              | ProtBert family |               |              |              |              |               | Alphafold   | Validations  |             |              |
|---------------|---------------|--------------|--------------|-----------------|---------------|--------------|--------------|--------------|---------------|-------------|--------------|-------------|--------------|
|               | Esm1          | Esm1b        | Esm1v        | protbert        | proteber      | prott5xl     | prott5xl     | protxlne     | protalbe      |             | DeepDT       | DeepCo      | DeepDT       |
|               |               |              |              | tbfd            | bfd           | t            | rt           | d            | I             | nvDTI       | A            |             |              |
| Esm1          | 0.00          | 2.81         | -2.43        | 0.63            | -1.73         | 2.63         | 2.60         | <b>-1.27</b> | <b>-4.06</b>  | <b>2.01</b> | <b>11.47</b> | <b>7.42</b> | <b>4.75</b>  |
| Esm1b         | -2.81         | 0.00         | <b>-3.78</b> | -0.74           | <b>-3.65</b>  | -0.48        | -0.25        | -2.80        | <b>-5.52</b>  | <b>0.20</b> | <b>8.42</b>  | <b>4.84</b> | 2.68         |
| Esm1v         | 2.43          | <b>3.78</b>  | 0.00         | 2.26            | <b>1.12</b>   | <b>3.64</b>  | <b>3.67</b>  | 1.03         | -0.91         | <b>3.39</b> | <b>8.66</b>  | <b>6.55</b> | <b>5.15</b>  |
| protbert      | -0.63         | 0.74         | -2.26        | 0.00            | -1.59         | 0.52         | 0.62         | -1.39        | <b>-3.30</b>  | 0.78        | <b>5.57</b>  | <b>3.60</b> | 2.41         |
| Protebertbfd* | 1.73          | <b>3.65</b>  | -1.12        | 1.59            | 0.00          | <b>3.51</b>  | <b>3.50</b>  | 0.04         | -2.37         | 2.95        | <b>10.28</b> | <b>7.28</b> | <b>5.25</b>  |
| prott5xl      | -2.63         | 0.48         | <b>-3.64</b> | -0.52           | <b>-3.51</b>  | 0.00         | 0.22         | -2.62        | <b>-5.44</b>  | 0.52        | <b>9.51</b>  | <b>5.56</b> | <b>3.15</b>  |
| prott5xlbfd   | -2.60         | 0.25         | <b>-3.67</b> | -0.62           | <b>-3.50</b>  | -0.22        | 0.00         | -2.67        | <b>-5.41</b>  | 0.37        | <b>8.76</b>  | <b>5.11</b> | 2.88         |
| protxlnet     | 1.27          | 2.80         | -1.03        | 1.39            | -0.04         | 2.62         | 2.67         | 0.00         | -2.09         | 2.48        | <b>8.21</b>  | <b>5.89</b> | <b>4.38</b>  |
| Protalbert*   | <b>4.06</b>   | <b>5.52</b>  | 0.91         | <b>3.30</b>     | 2.37          | <b>5.44</b>  | <b>5.41</b>  | 2.09         | 0.00          | <b>4.73</b> | <b>10.86</b> | <b>8.44</b> | <b>6.73</b>  |
| alphafold     | -2.01         | <b>-0.20</b> | <b>-3.39</b> | -0.78           | -2.95         | -0.52        | -0.37        | -2.48        | -4.73         | 0.00        | <b>5.86</b>  | <b>3.39</b> | 1.93         |
| DeepDTI       | <b>-11.47</b> | <b>-8.42</b> | <b>-8.66</b> | <b>-5.57</b>    | <b>-10.28</b> | <b>-9.51</b> | <b>-8.76</b> | <b>-8.21</b> | <b>-10.86</b> | -5.86       | 0.00         | -2.83       | <b>-3.95</b> |
| DeepConvDTI   | <b>-7.42</b>  | <b>-4.84</b> | <b>-6.55</b> | <b>-3.60</b>    | <b>-7.28</b>  | <b>-5.56</b> | <b>-5.11</b> | <b>-5.89</b> | <b>-8.44</b>  | -3.39       | 2.83         | 0.00        | -1.38        |
| DeepDTA       | <b>-4.75</b>  | -2.68        | <b>-5.15</b> | -2.41           | <b>-5.25</b>  | <b>-3.15</b> | -2.88        | <b>-4.38</b> | <b>-6.73</b>  | -1.93       | <b>3.95</b>  | 1.38        | 0.00         |

Significant scores ( $p$ -value<0.005) have been marked in **bold**

\* Relatively better models based on t-test stastic

**Table S2: Paired t-test to compare docking scores of all the models under consideration for MAP2K.**

|              | ESM Family   |              |              | ProtBert family |              |              |               |              |               | Alphafold    | Validations  |              |              |
|--------------|--------------|--------------|--------------|-----------------|--------------|--------------|---------------|--------------|---------------|--------------|--------------|--------------|--------------|
|              | Esm1         | Esm1b        | Esm1v        | protbert        | proteber     | prott5xl     | prott5xl      | protxlne     | protalbe      |              | DeepDT       | DeepCo       | DeepDT       |
|              |              |              |              | tbfd            | bfd          | t            | rt            | old          | I             | nvDTI        | A            |              |              |
| Esm1         | 0.00         | 0.00         | <b>-6.27</b> | <b>-4.39</b>    | <b>-7.51</b> | <b>-8.74</b> | <b>-21.80</b> | <b>-6.28</b> | <b>-12.51</b> | <b>-9.69</b> | 0.81         | -0.87        | <b>-3.32</b> |
| Esm1b        | 0.00         | 0.00         | <b>-6.27</b> | <b>-4.39</b>    | <b>-7.51</b> | <b>-8.74</b> | <b>-21.80</b> | <b>-6.28</b> | <b>-12.51</b> | <b>-9.69</b> | 0.81         | -0.87        | <b>-3.32</b> |
| Esm1v        | <b>6.27</b>  | <b>6.27</b>  | 0.00         | -0.82           | -1.44        | -0.42        | <b>-10.93</b> | 0.24         | <b>-4.43</b>  | -2.65        | <b>6.50</b>  | <b>4.00</b>  | 1.21         |
| protbert     | <b>4.39</b>  | <b>4.39</b>  | 0.82         | 0.00            | -0.11        | 0.65         | <b>-5.14</b>  | 0.98         | -1.72         | -0.77        | <b>4.69</b>  | 3.44         | 1.60         |
| protebertbfd | <b>7.51</b>  | <b>7.51</b>  | 1.44         | 0.11            | 0.00         | 1.31         | <b>-8.51</b>  | 1.71         | -2.60         | -1.03        | <b>7.68</b>  | <b>5.13</b>  | 2.33         |
| prott5xl     | <b>8.74</b>  | <b>8.74</b>  | 0.42         | -0.65           | -1.31        | 0.00         | <b>-14.12</b> | 0.74         | <b>-5.14</b>  | -2.81        | <b>8.59</b>  | <b>4.94</b>  | 1.66         |
| prott5xlbfd* | <b>21.80</b> | <b>21.80</b> | <b>10.93</b> | <b>5.14</b>     | <b>8.51</b>  | <b>14.12</b> | 0.00          | <b>11.78</b> | <b>7.10</b>   | <b>8.29</b>  | <b>20.22</b> | <b>13.78</b> | <b>9.33</b>  |
| protxlnet    | <b>6.28</b>  | <b>6.28</b>  | -0.24        | -0.98           | -1.71        | -0.74        | <b>-11.78</b> | 0.00         | <b>-4.89</b>  | <b>-3.00</b> | <b>6.50</b>  | <b>3.89</b>  | 1.05         |
| protalbert   | <b>12.51</b> | <b>12.51</b> | <b>4.43</b>  | 1.72            | 2.60         | 5.14         | <b>-7.10</b>  | <b>4.89</b>  | 0.00          | 1.68         | <b>12.14</b> | <b>8.12</b>  | <b>4.64</b>  |
| Alphafold*   | <b>9.69</b>  | <b>9.69</b>  | 2.65         | 0.77            | 1.03         | 2.81         | <b>-8.29</b>  | <b>3.00</b>  | -1.68         | 0.00         | <b>9.64</b>  | <b>6.43</b>  | <b>3.30</b>  |
| DeepDTI      | -0.81        | -0.81        | <b>-6.50</b> | <b>-4.69</b>    | <b>-7.68</b> | <b>-8.59</b> | <b>-20.22</b> | <b>-6.50</b> | <b>-12.14</b> | <b>-9.64</b> | <b>0.00</b>  | -1.41        | -3.71        |
| DeepConvDTI  | 0.87         | 0.87         | <b>-4.00</b> | -3.44           | <b>-5.13</b> | <b>-4.94</b> | <b>-13.78</b> | <b>-3.89</b> | <b>-8.12</b>  | <b>-6.43</b> | <b>1.41</b>  | 0.00         | -2.17        |
| DeepDTA      | <b>3.32</b>  | <b>3.32</b>  | -1.21        | -1.60           | -2.33        | -1.66        | <b>-9.33</b>  | -1.05        | <b>-4.64</b>  | <b>-3.30</b> | <b>3.71</b>  | 2.17         | 0.00         |

Significant scores ( $p$ -value<0.005) have been marked in **bold**

\* Relatively better models based on t-test stastic

## 2. Supplementary figures

Figure S1: Schematic representation of the seed model architecture on which all the proposed methods are based on.

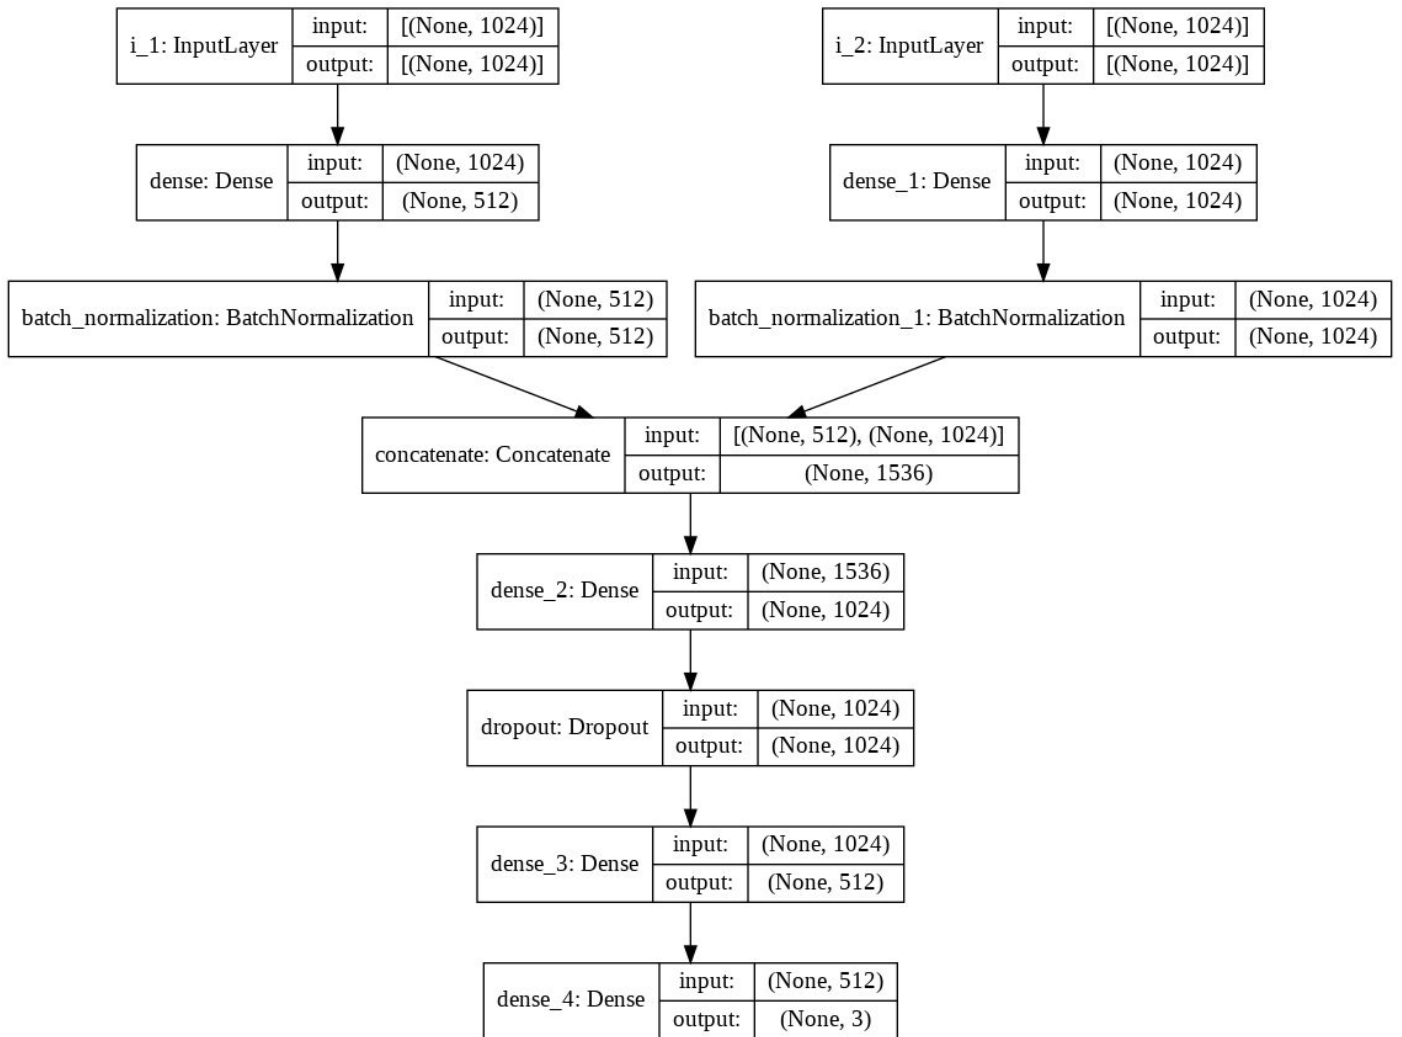

Figure S2: Interaction dynamics for map2k and tgfb from 100ns simulation

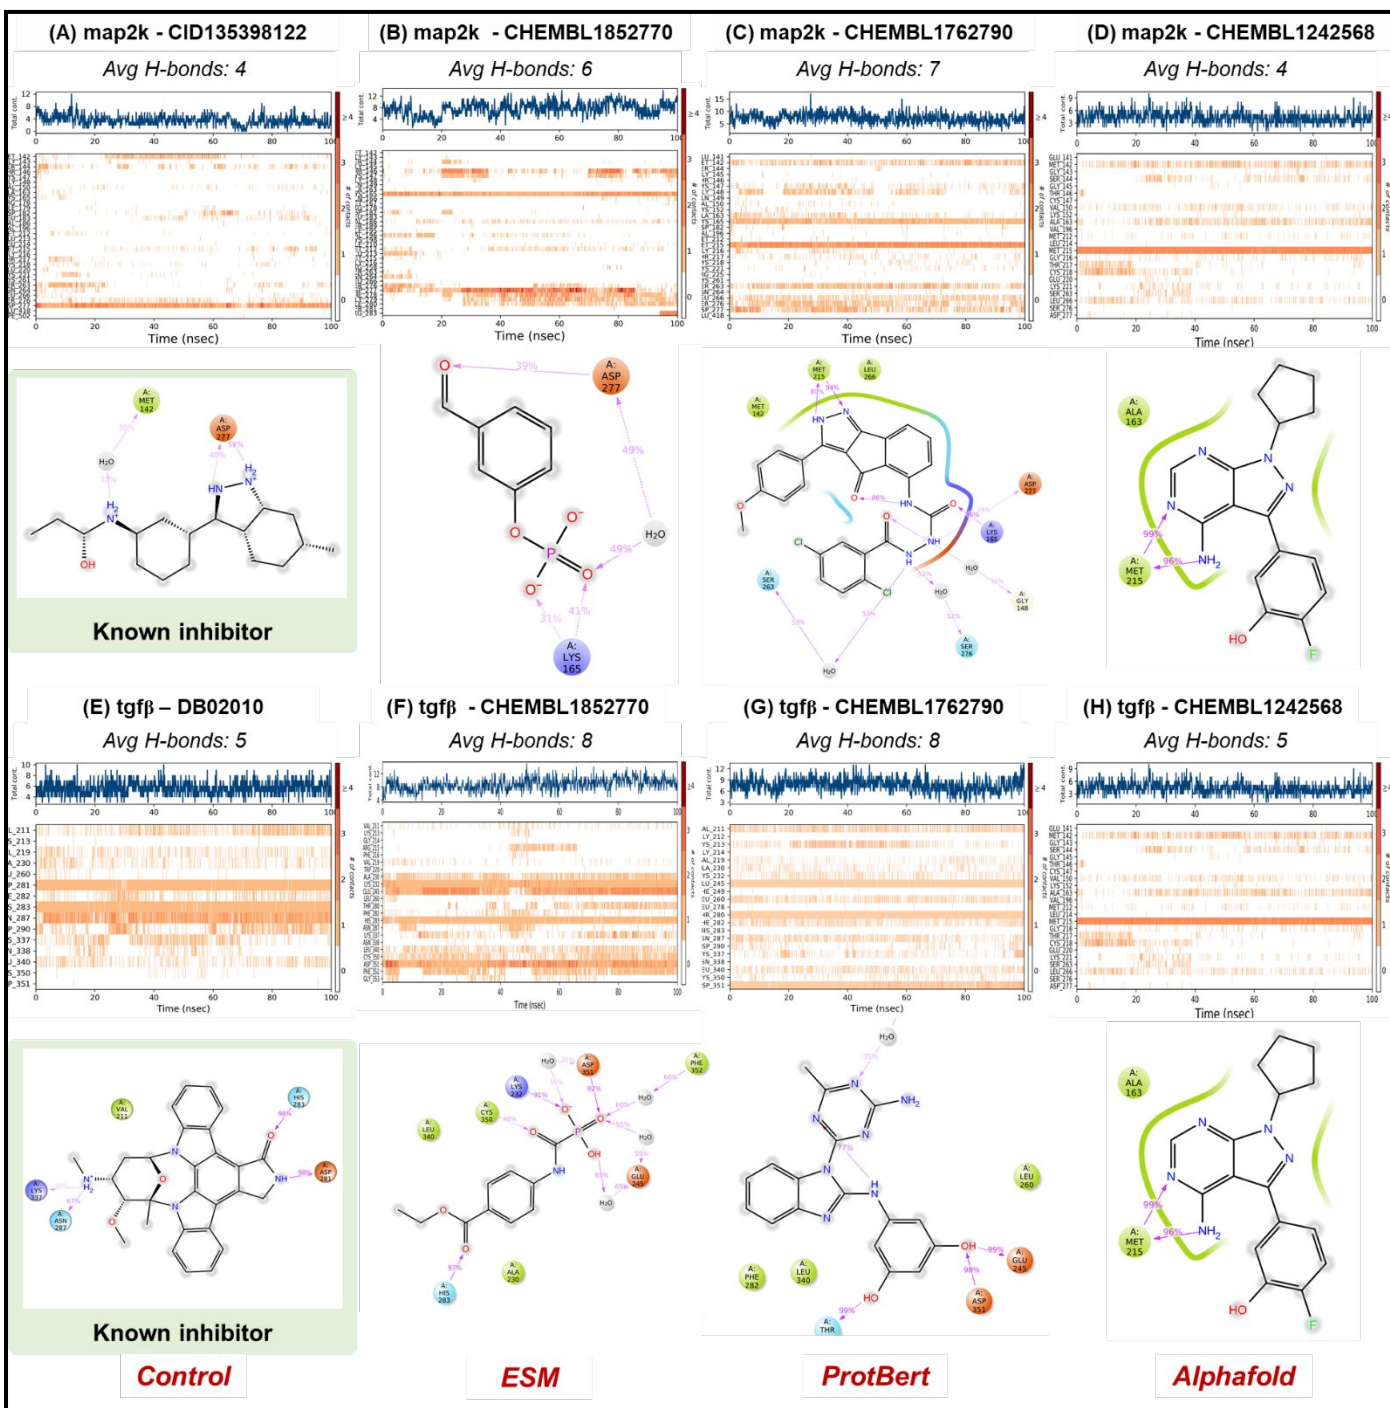

Figure S3: RMSD for the simulated complexes

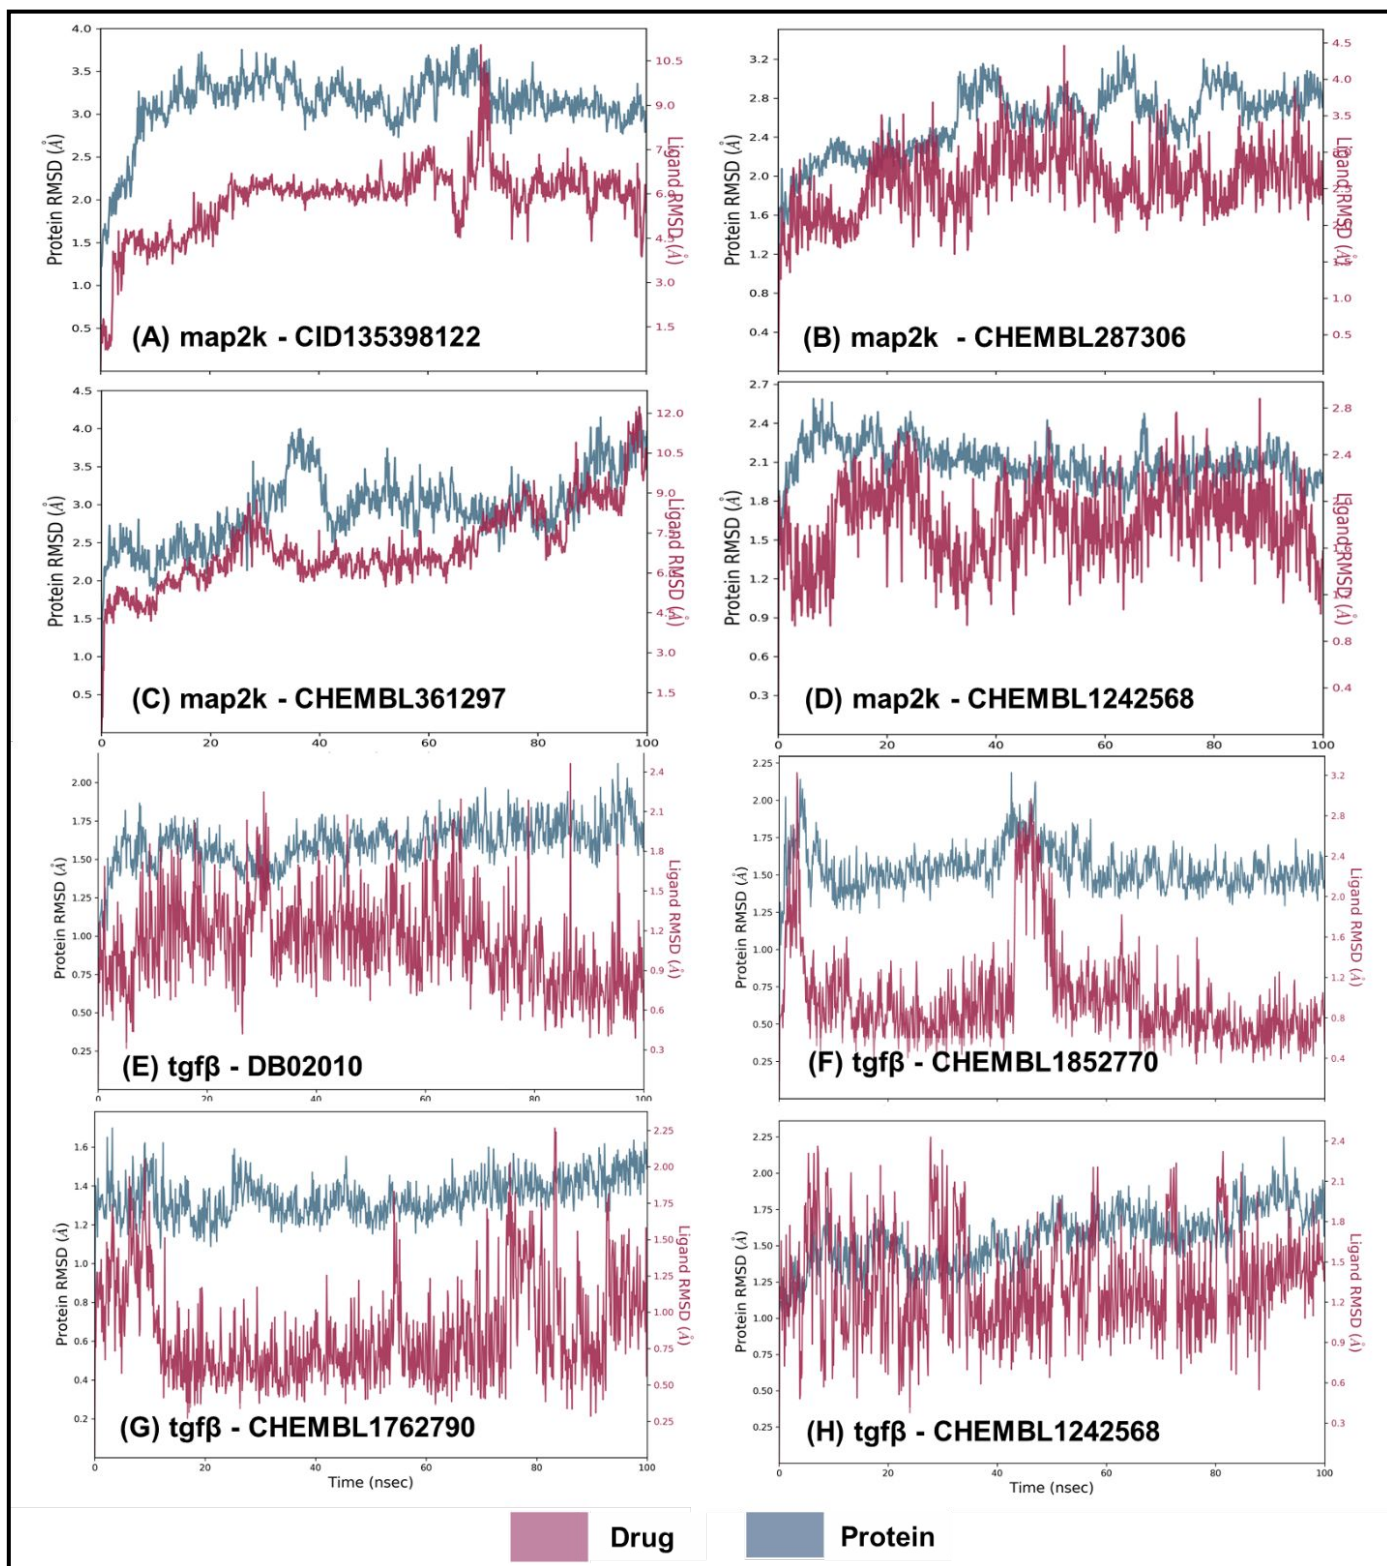

**Figure S4: TSNE mappings for proteins**

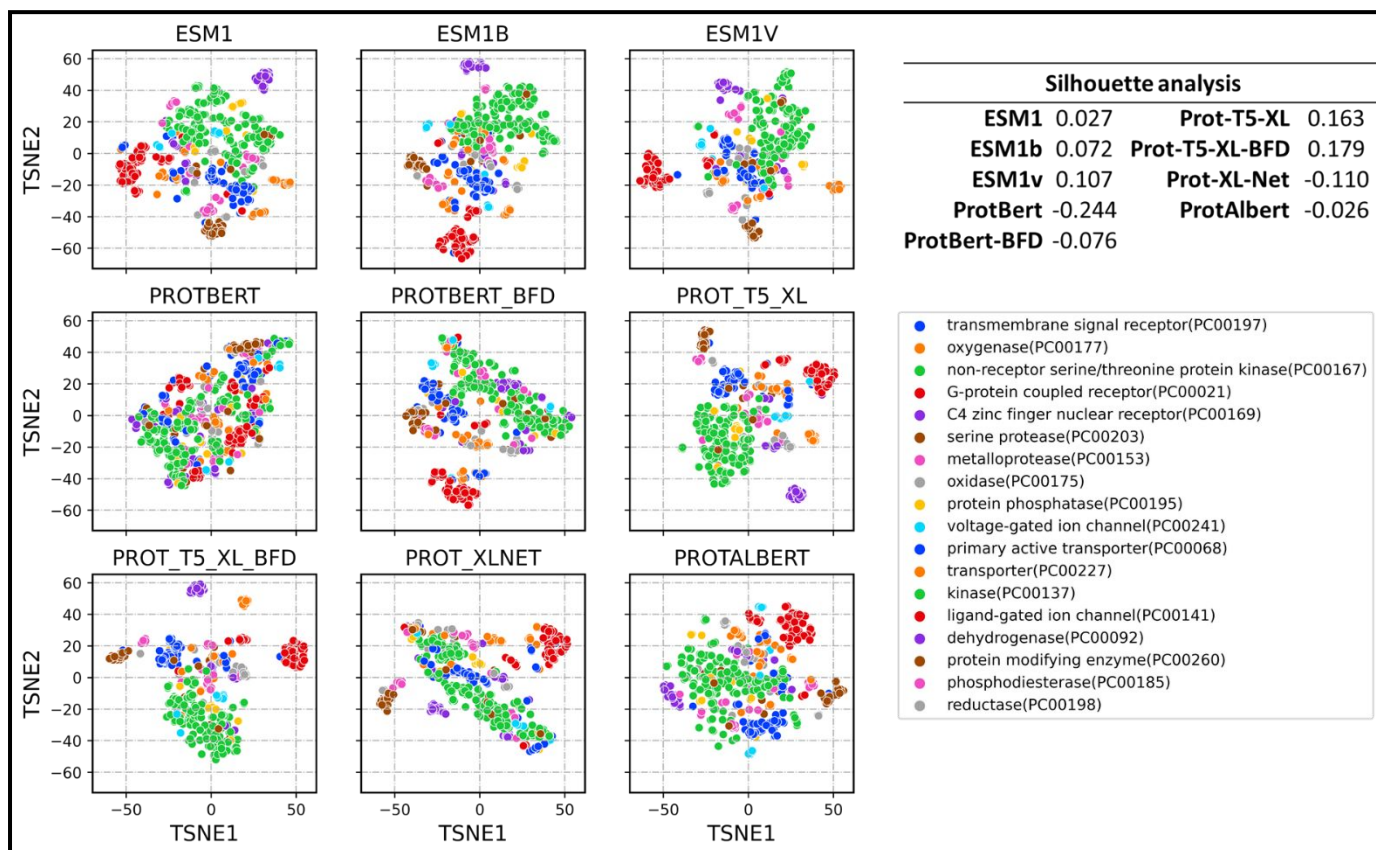

**Figure S5:** ROC and PR curves for all the models under consideration in the classification task. auPR and auROC scores are also mentioned for each model

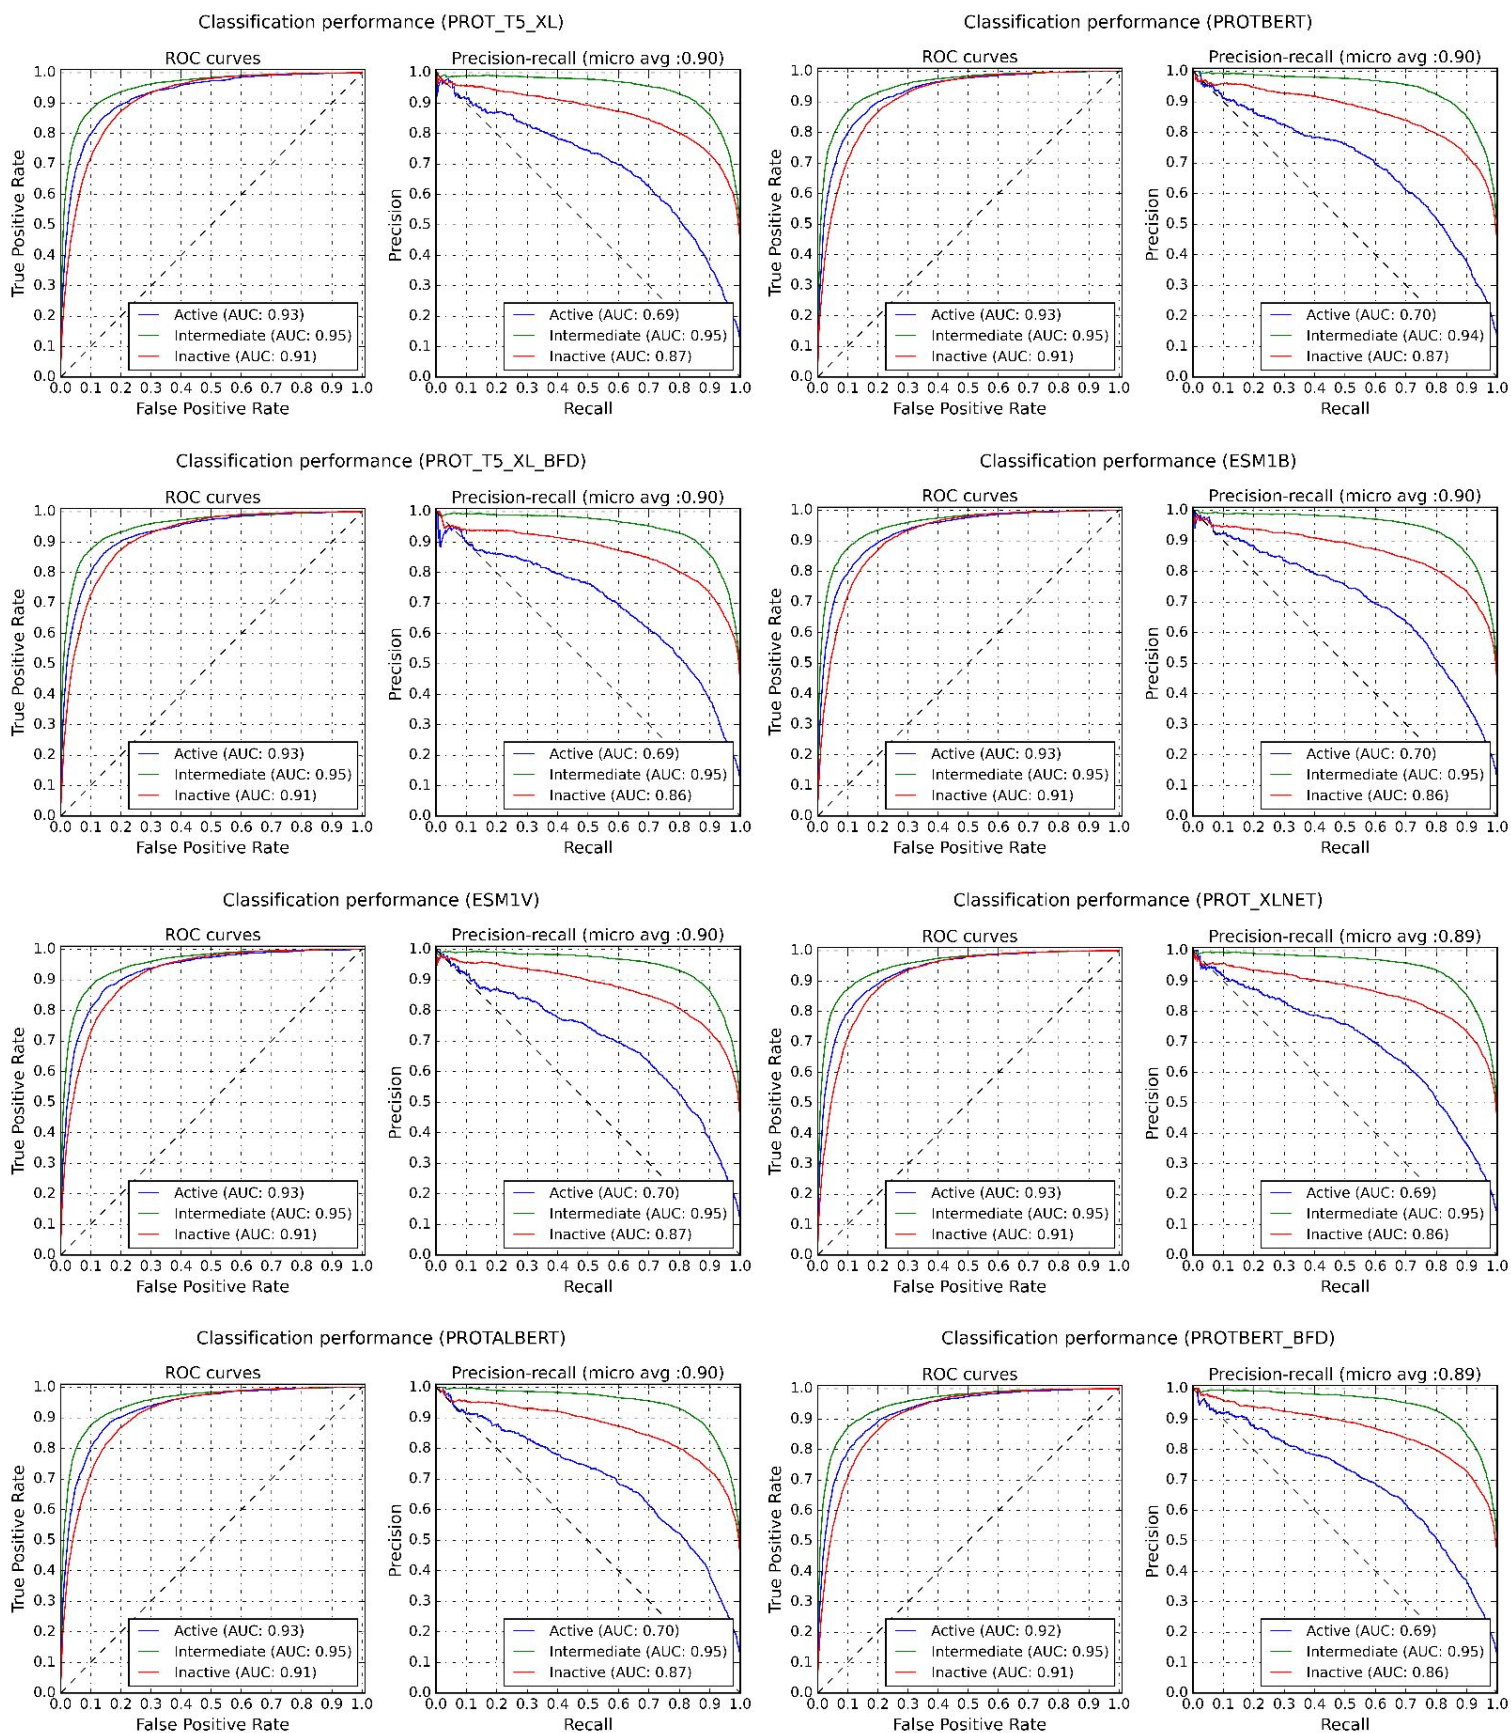

**Figure S6:** Coefficient of determination for all the proposed models

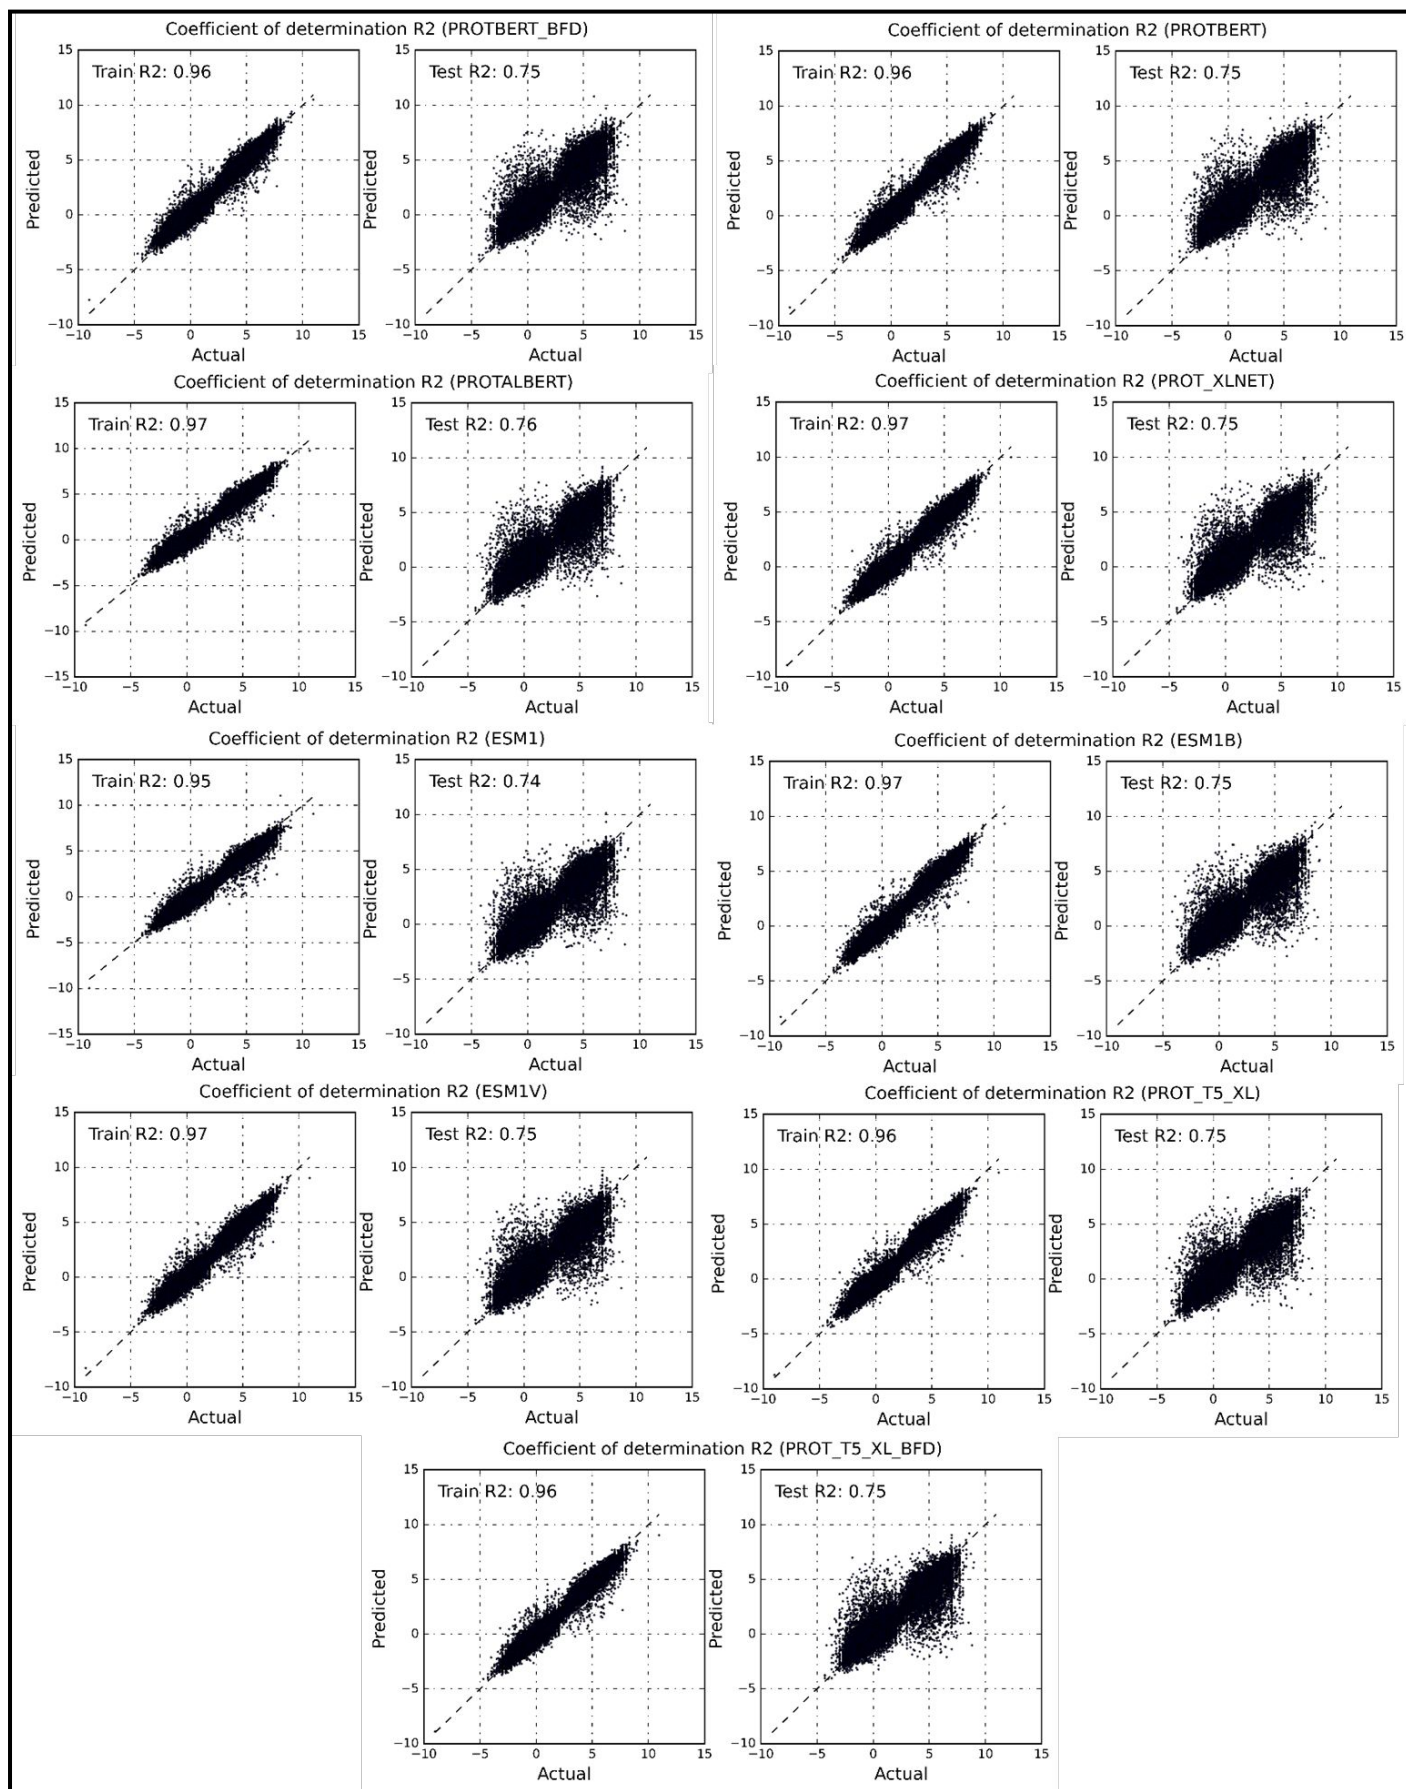



**Figure S7:** Training statistics for all the models under consideration shows excellent statistics and minimal overfitting

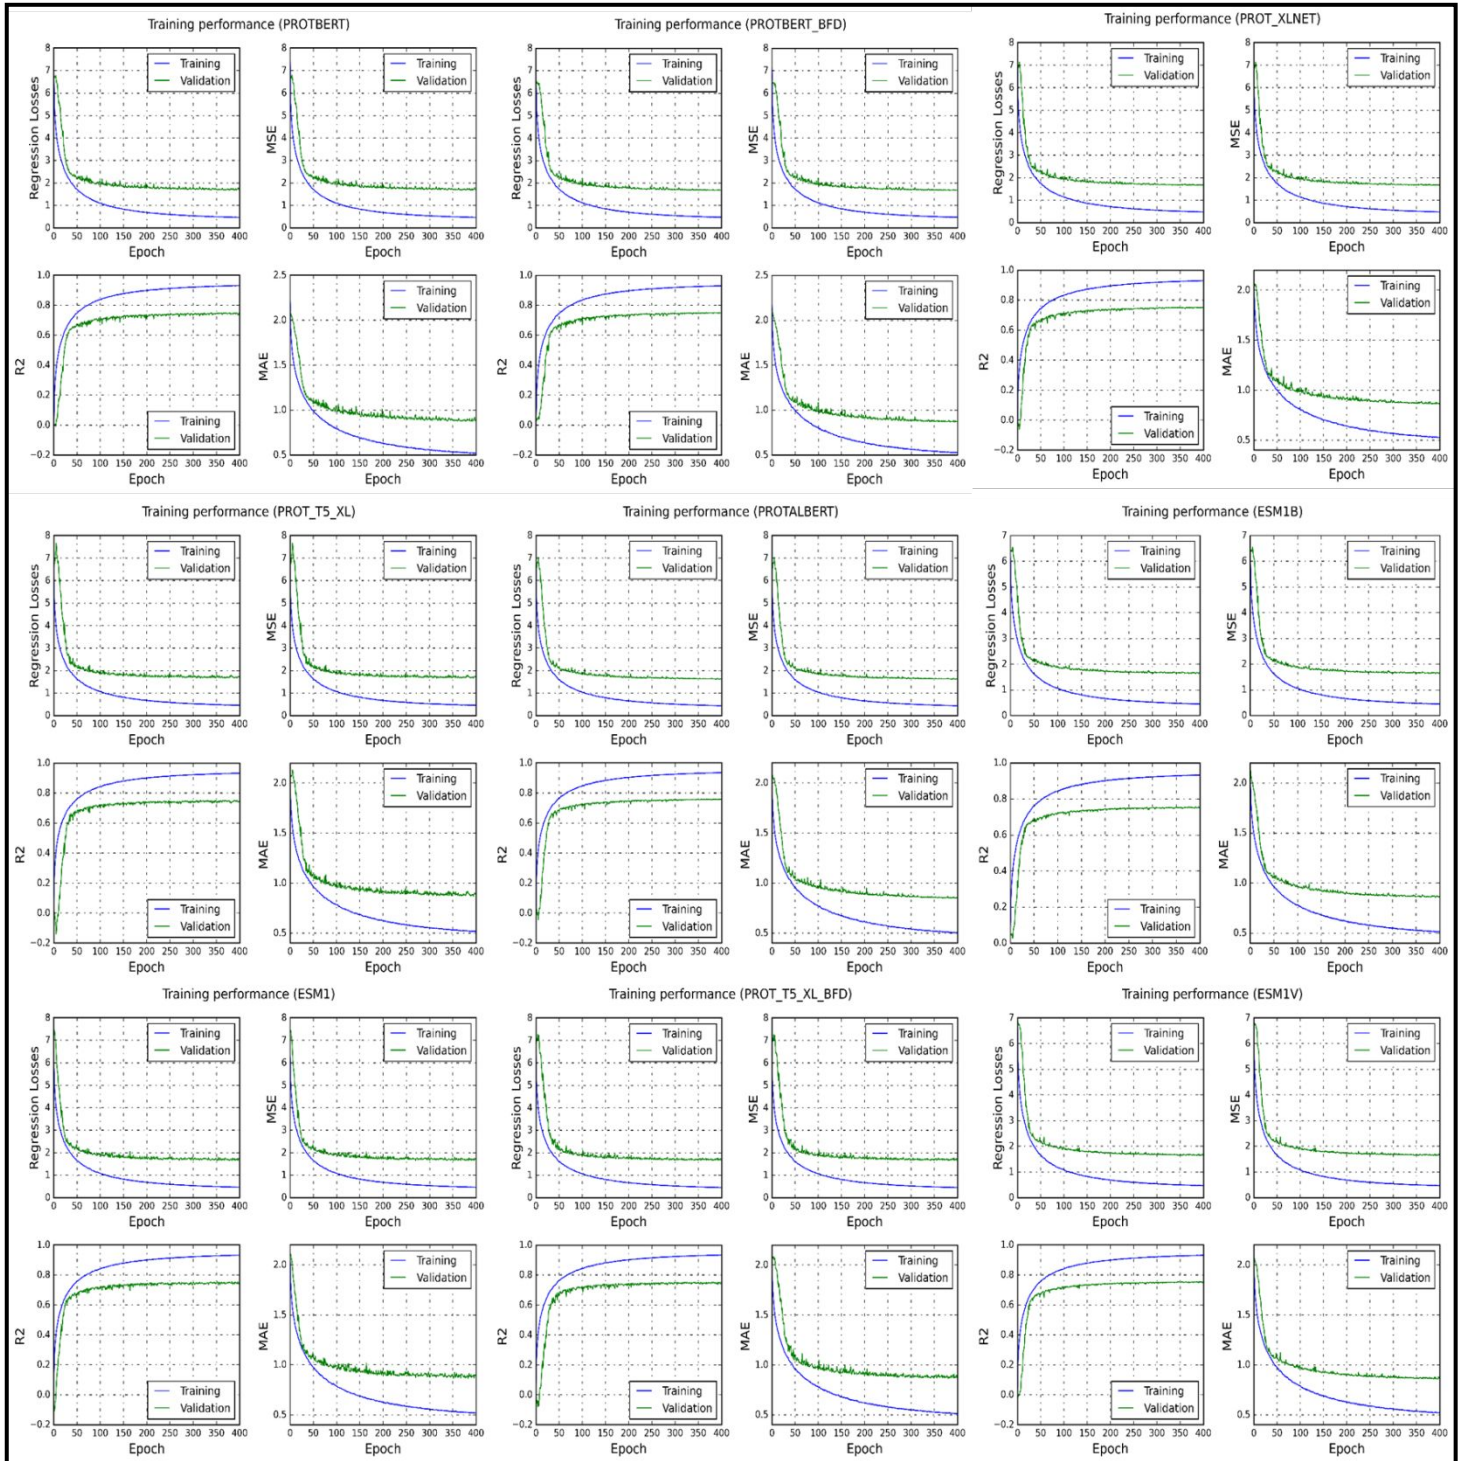

**Figure S8:** PANTHER enrichment results for a selected group of proteins in the data for classification, molecular function and biological processes

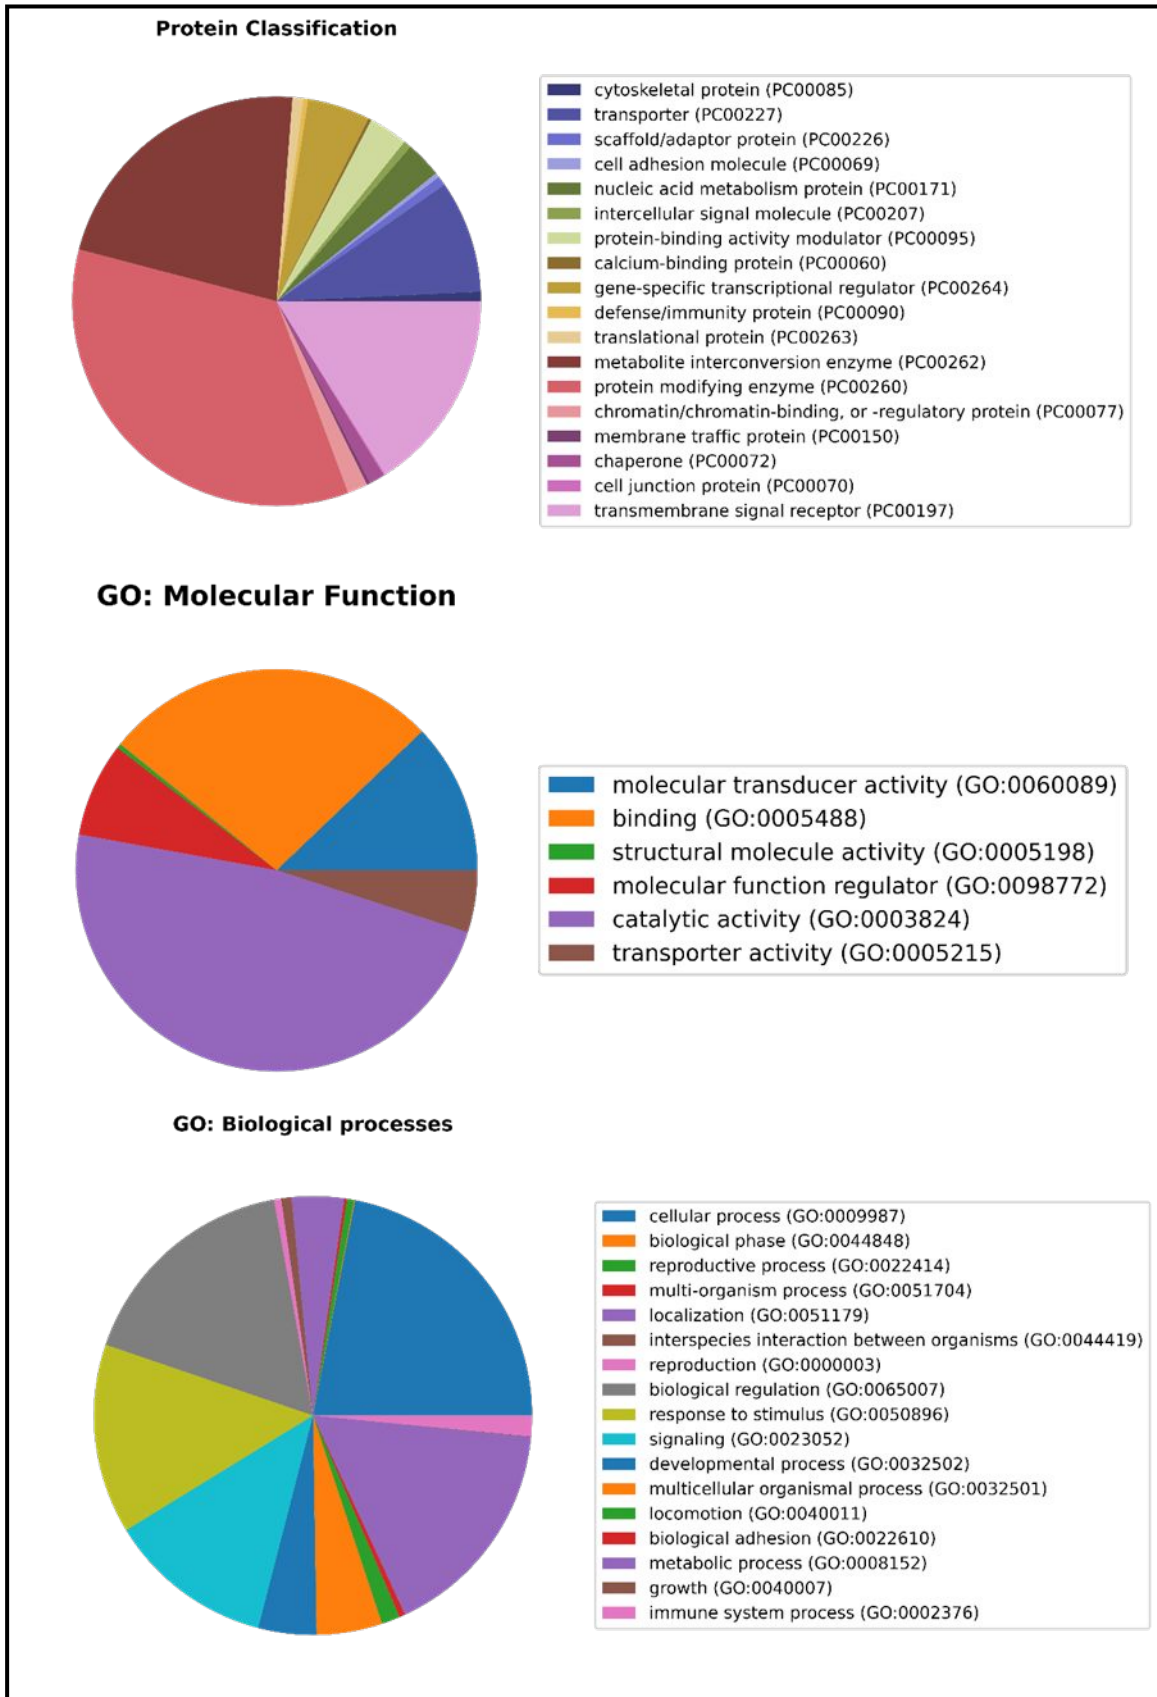

Supplement: ao1c05203_si_001.pdf [file ao1c05203_si_001.pdf]
